# Supplementary material
Source: Springer Nature journal article supplement (https://www.springermedizin.de/resource/supplementary/12883_2011_477_MOESM1_ESM.pdf/9455532)
Supplement: MOESM1 [file 9455532]

Recruitment

Baseline Measurement  
(T1)

Randomisation  
(n=132)

CONTROL

Usual care  
+  
2 phone contacts  
(2 & 6 weeks post  
discharge)

N=66

INTERVENTION

Usual care  
+  
2 phone contacts  
(2 & 6 weeks post  
discharge)  
+  
Written information  
provision  
+  
Home Visit  
(3 months post  
discharge)  
+  
Additional phone  
contact  
(9 months post-  
discharge)

N=66

Follow-up  
assessment at six  
months post-  
stroke (T2)

Follow-up  
assessment at six  
months post-  
stroke (T2)

Follow-up  
assessment at  
twelve months  
post-stroke (T3)

Follow-up  
assessment at  
twelve months  
post-stroke (T3)
